# Supplementary material for: Screening Tools Based on Nomogram for Diabetic Kidney Diseases in Chinese Type 2 Diabetes Mellitus Patients
Source: PubMed Central journal article supplement — Diabetes Metab J. 2021 Apr 13;45(5):708–18. doi: 10.4093/dmj.2020.0117 (PMC8497917; doi:10.4093/dmj.2020.0117), 2021-04-13
Supplement: dmj-2020-0117-suppl1.pdf [file dmj-2020-0117-suppl1.pdf]

**Supplementary Table 1.** Baseline demographic characteristics and biochemical indexes of study participants

| Characteristic          | Men (n=1,227)      | Women (n=936)      | P value |
|-------------------------|--------------------|--------------------|---------|
| Age, yr                 | 51.00±13.49        | 54.88±14.27        | <0.001  |
| Smoking                 |                    |                    | <0.001  |
| Yes                     | 545 (44.4)         | 9 (1.0)            |         |
| No                      | 682 (55.6)         | 927 (99.0)         |         |
| Drinking                |                    |                    | <0.001  |
| Yes                     | 493 (40.2)         | 10 (1.1)           |         |
| No                      | 734 (59.8)         | 926 (98.9)         |         |
| Hypertension            |                    |                    | 0.407   |
| Yes                     | 415 (44.3)         | 521 (42.5)         |         |
| No                      | 521 (55.7)         | 706 (57.5)         |         |
| CHD                     |                    |                    | 0.004   |
| Yes                     | 240 (19.6)         | 70 (22.4)          |         |
| No                      | 987 (80.4)         | 243 (77.6)         |         |
| DR                      |                    |                    | 0.999   |
| Yes                     | 254 (20.7)         | 193 (20.6)         |         |
| No                      | 973 (79.3)         | 743 (79.4)         |         |
| Diabetic foot           |                    |                    | 0.999   |
| Yes                     | 19 (1.5)           | 14 (1.5)           |         |
| No                      | 1208 (98.5)        | 922 (98.5)         |         |
| Diabetic family history |                    |                    | 0.725   |
| Yes                     | 473 (38.5)         | 353 (37.7)         |         |
| No                      | 754 (61.5)         | 583 (62.3)         |         |
| DD, yr                  | 7.09±6.29          | 6.91±6.94          | 0.563   |
| BMI, kg/m <sup>2</sup>  | 25.81±3.99         | 25.72±3.60         | 0.567   |
| DBP, mm Hg              | 83.57±11.45        | 80.74±10.65        | <0.001  |
| SBP, mm Hg              | 134.59±17.87       | 132.79±18.83       | <0.001  |
| FPG, mmol/L             | 8.15±2.70          | 8.04±2.71          | 0.337   |
| HbA1c, %                | 8.39±2.00          | 8.26±1.92          | 0.119   |
| FINS, mmol/L            | 7.50 (5.20–11.30)  | 7.40 (5.10–12.50)  | 0.336   |
| FCP, ng/mL              | 1.89±1.52          | 1.68±1.21          | <0.001  |
| Creatinine, μmol/L      | 104.75±128.50      | 80.03±102.59       | <0.001  |
| HDL-C, mmol/L           | 1.04±0.30          | 1.18±0.34          | <0.001  |
| LDL-C, mmol/L           | 2.62±0.99          | 2.77±0.98          | <0.001  |
| TC, mmol/L              | 4.22±1.16          | 4.49±1.27          | <0.001  |
| TG, mmol/L              | 2.03±1.81          | 1.80±1.43          | 0.002   |
| Uric acid, μmol/L       | 298.47±95.21       | 255.95±89.50       | <0.001  |
| uALB, mg/day            | 15.00 (9.90–33.37) | 14.50 (9.50–30.50) | <0.001  |
| eGFR, %                 | 95.90±30.26        | 95.16±30.14        | 0.573   |
| DKD                     |                    |                    | 0.049   |
| Yes                     | 194 (15.8)         | 119 (12.7)         |         |
| No                      | 1033 (84.2)        | 817 (87.3)         |         |

Values are presented as mean ± standard deviation, number (%), or median (interquartile range).

CHD, coronary heart disease; DR, diabetic retinopathy; DD, diabetes duration; BMI, body mass index; DBP, diastolic blood pressure; SBP, systolic blood pressure; FPG, fasting plasma glucose; HbA1c, glycosylated hemoglobin; FINS, fasting serum insulin; FCP, fasting plasma C-peptide; HDL-C, high density lipoprotein cholesterol; LDL-C, low density lipoprotein cholesterol; TC, total cholesterol; TG, triglyceride; uALB, urine albumin; eGFR, estimated glomerular filtration rate; DKD, diabetic kidney disease.
