# Supplementary material for: Screening Tools Based on Nomogram for Diabetic Kidney Diseases in Chinese Type 2 Diabetes Mellitus Patients
Source: PubMed Central journal article supplement — Diabetes Metab J. 2021 Apr 13;45(5):708–18. doi: 10.4093/dmj.2020.0117 (PMC8497917; doi:10.4093/dmj.2020.0117), 2021-04-13
Supplement: dmj-2020-0117-suppl2.pdf [file dmj-2020-0117-suppl2.pdf]

**Supplementary Table 2.** Univariate logistic regression analysis for diabetic kidney diseases

| Variable                             | $\beta$ | OR (95% CI)             | P value |
|--------------------------------------|---------|-------------------------|---------|
| Age, yr                              | 0.0283  | 1.0310 (1.0195–1.0379)  | <0.0001 |
| Gender (men vs. women)               | 0.2542  | 1.2894 (1.0082–1.6489)  | 0.0429  |
| Smoking (yes vs. no)                 | -0.0033 | 0.9967 (0.7574–1.3117)  | 0.9813  |
| Drinking (yes vs. no)                | -0.2834 | 0.7532 (0.5574–1.0178)  | 0.0650  |
| Hypertension (yes vs. no)            | 1.4464  | 4.2478 (3.2580–5.5383)  | <0.0001 |
| CHD (yes vs. no)                     | 0.0369  | 1.0376 (0.7780–1.3838)  | 0.8016  |
| DR (yes vs. no)                      | 1.0460  | 2.8463 (2.2001–3.6824)  | <0.0001 |
| Diabetic foot (yes vs. no)           | 1.6337  | 5.1230 (2.5540–10.2761) | <0.0001 |
| Diabetic family history (yes vs. no) | 0.0860  | 1.0898 (0.8531–1.3923)  | 0.4913  |
| DD, yr                               | 0.0860  | 1.0898 (0.8531–1.3923)  | <0.0001 |
| BMI, kg/m <sup>2</sup>               | 0.0366  | 1.0372 (1.0060–1.0695)  | 0.0193  |
| DBP, kg/m <sup>2</sup>               | 0.0138  | 1.0139 (1.0033–1.0246)  | 0.0098  |
| SBP, kg/m <sup>2</sup>               | 0.0397  | 1.0405 (1.0338–1.0472)  | <0.0001 |
| FPG, mmol/L                          | 0.0434  | 1.0444 (1.0018–1.0889)  | 0.0409  |
| HbA1c, %                             | -0.1353 | 0.8735 (0.8175–0.9332)  | 0.0001  |
| FINS, mmol/L                         | 0.2542  | 1.2894 (1.0082–1.6489)  | <0.0001 |
| FCP, mmol/L                          | 0.3105  | 1.3641 (1.2574–1.4797)  | <0.0001 |
| Creatinine, mmol/L                   | 0.0161  | 1.0163 (1.0137–1.0188)  | <0.0001 |
| HDL-C, mmol/L                        | 0.1676  | 1.1824 (0.8288–1.6870)  | 0.3554  |
| LDL-C, mmol/L                        | 0.2129  | 1.2372 (1.1073–1.3823)  | 0.0002  |
| TC, mmol/L                           | 0.0898  | 1.0940 (0.9714–1.2320)  | <0.0001 |
| TG, mmol/L                           | 0.0398  | 1.0406 (0.9741–1.1116)  | 0.2372  |
| Uric acid, mmol/L                    | 0.0050  | 1.0050 (1.0038–1.0062)  | <0.0001 |

OR, odds ratio; CI, confidence interval; CHD, coronary heart disease; DR, diabetic retinopathy; DD, diabetes duration; BMI, body mass index; DBP, diastolic blood pressure; SBP, systolic blood pressure; FPG, fasting plasma glucose; HbA1c, glycosylated hemoglobin; FINS, fasting serum insulin; FCP, fasting plasma C-peptide; HDL-C, high density lipoprotein cholesterol; LDL-C, low density lipoprotein cholesterol; TC, total cholesterol; TG, triglyceride.
