# Supplementary material for: Screening Tools Based on Nomogram for Diabetic Kidney Diseases in Chinese Type 2 Diabetes Mellitus Patients
Source: PubMed Central journal article supplement — Diabetes Metab J. 2021 Apr 13;45(5):708–18. doi: 10.4093/dmj.2020.0117 (PMC8497917; doi:10.4093/dmj.2020.0117), 2021-04-13
Supplement: dmj-2020-0117-suppl3.pdf [file dmj-2020-0117-suppl3.pdf]

**Supplementary Table 3.** Cross-validation of four logistic models for internal consistency of diabetic kidney diseases prevalent risk

| Index            | Index original | Training | Test    | Optimism | Index corrected |
|------------------|----------------|----------|---------|----------|-----------------|
| Full model       |                |          |         |          |                 |
| Dxy <sup>a</sup> | 0.6909         | 0.6912   | 0.6937  | -0.0026  | 0.6935          |
| R <sup>2b</sup>  | 0.3602         | 0.3603   | 0.3958  | -0.0354  | 0.3957          |
| Slope            | 0              | 0        | 0.6397  | -0.6397  | 0.6397          |
| D                | 1              | 1        | 2.2288  | -1.2288  | 2.2288          |
| U                | 0              | 0        | 0.2328  | 0.2328   | 0.2328          |
| Q                | 0.2260         | 0.2261   | 0.2265  | -0.0005  | 0.2265          |
| g                | -0.0009        | -0.0009  | 0.0048  | -0.0057  | 0.0048          |
| LBM1             |                |          |         |          |                 |
| Dxy <sup>a</sup> | 0.6297         | 0.6299   | 0.6215  | 0.0084   | 0.6214          |
| R <sup>2b</sup>  | 0.2878         | 0.2879   | 0.3120  | -0.0241  | 0.3119          |
| Slope            | 0              | 0        | 0.0903  | -0.0903  | 0.0903          |
| D                | 1              | 1        | 1.1699  | -0.1699  | 1.1699          |
| U                | 0              | 0        | 0.0483  | 0.0483   | 0.0483          |
| Q                | 0.1761         | 0.1762   | 0.1721  | 0.0042   | 0.1720          |
| g                | -0.0009        | -0.0009  | 0.0010  | -0.0019  | 0.0010          |
| LBM2             |                |          |         |          |                 |
| Dxy <sup>a</sup> | 0.6342         | 0.6343   | 0.6251  | 0.0092   | 0.6250          |
| R <sup>2b</sup>  | 0.2960         | 0.2962   | 0.3304  | -0.0343  | 0.3303          |
| Slope            | 0              | 0        | 0.1707  | -0.1707  | 0.1707          |
| D                | 1              | 1        | 1.1953  | -0.1953  | 1.1953          |
| U                | 0              | 0        | 0.0658  | 0.0658   | 0.0658          |
| Q                | 0.1817         | 0.1818   | 0.1849  | -0.0032  | 0.1849          |
| g                | -0.0009        | -0.0009  | 0.0108  | -0.0117  | 0.0108          |
| Simplified model |                |          |         |          |                 |
| Dxy <sup>a</sup> | 0.6166         | 0.6166   | 0.6169  | -0.0002  | 0.6169          |
| R <sup>2b</sup>  | 0.2713         | 0.2714   | 0.3156  | -0.0442  | 0.3155          |
| Slope            | 0              | 0        | -0.1265 | 0.1265   | -0.1265         |
| D                | 1              | 1        | 1.6130  | -0.6130  | 1.6130          |
| U                | 0              | 0        | 0.1198  | 0.1198   | 0.1198          |
| Q                | 0.1652         | 0.1652   | 0.1723  | -0.0071  | 0.1722          |
| g                | -0.0009        | -0.0009  | 0.0131  | -0.0141  | 0.0132          |

LBM1, laboratory-based model 1; LBM2, laboratory-based model 2.

<sup>a</sup>Dxy means Somers'  $D_{xy}$ . When  $Y$  is binary,  $D_{xy} = 2 \times (c - 0.5)$  where  $c$  is the concordance probability or area under the receiver operating characteristic curve, a linear translation of the Wilcoxon-Mann-Whitney statistic, <sup>b</sup> $R^2$  is mostly a measure of discrimination, and  $R^2_{adj}$  is a good overfitting-corrected measure, if the model is pre-specified. Estimating the relationship between the predicted probability and the observed outcome in calibration also leads to indexes of unreliability (U), discrimination (D), and overall quality ( $Q = D - U$ ) which are derived from likelihood ratio tests. Q is a logarithmic scoring rule, which can be compared with Brier's index. The g-index is a new measure of a model's predictive discrimination, an interpretable, robust, and highly efficient measure of variation.
